# Supplementary material
Source: HighWire-hosted journal article supplement (https://jmg.bmj.com/content/56/1/29)

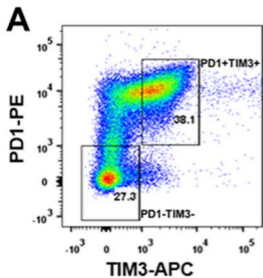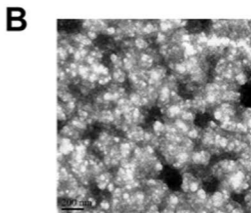

Electron  
Micrograph

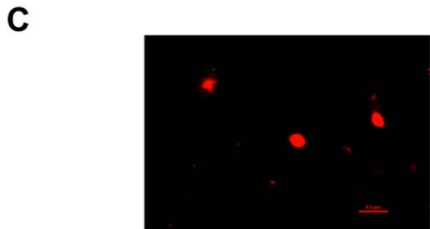

Anti-CD63

Supplement: inline-supplementary-material-3 [file inline-supplementary-material-3.pdf]

**A**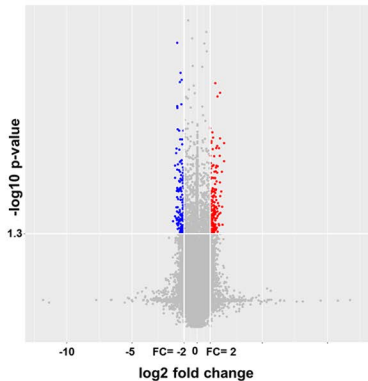**B**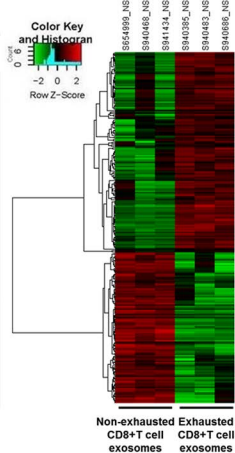

Supplement: inline-supplementary-material-4 [file inline-supplementary-material-4.pdf]

**A****GO Classification**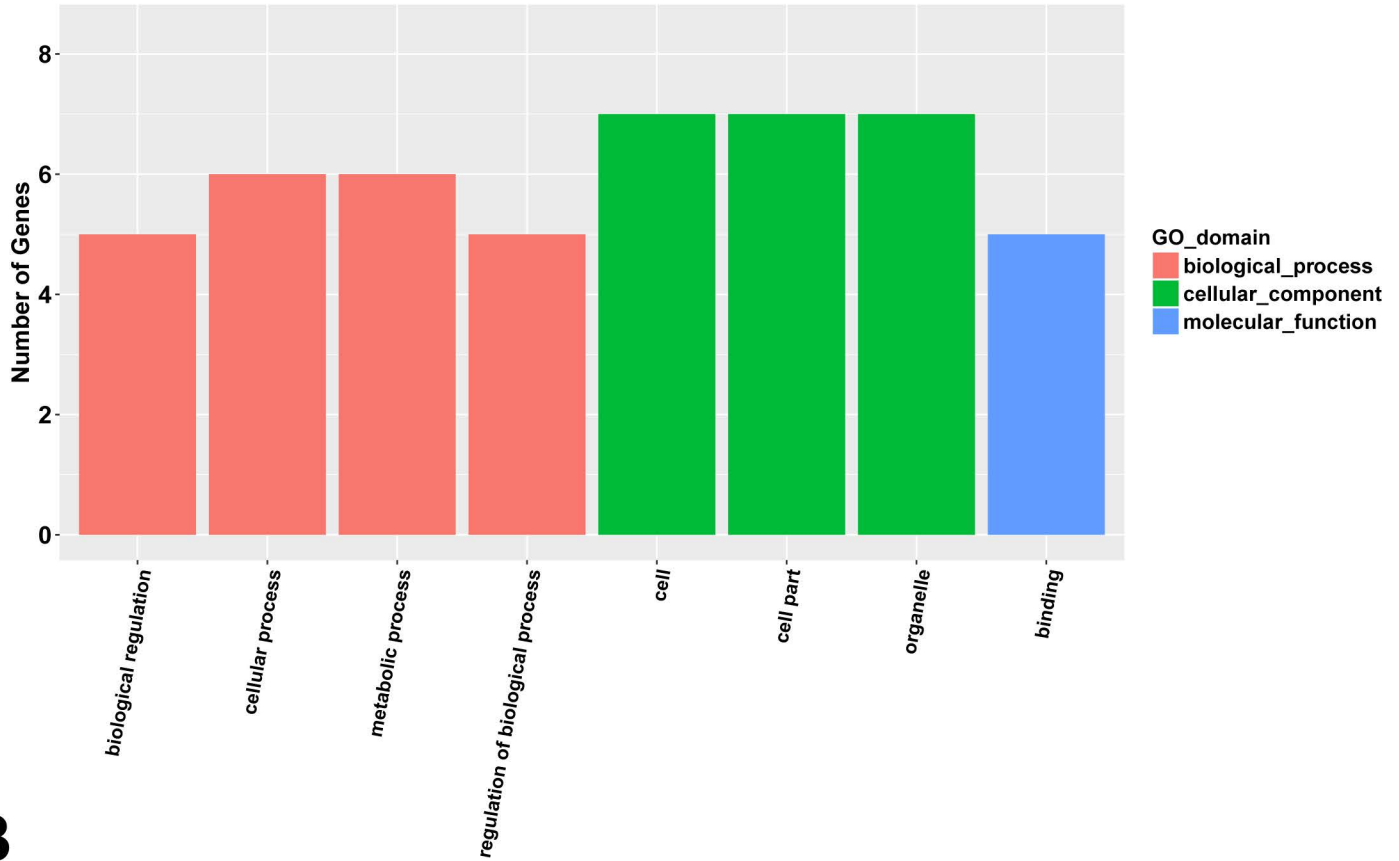**B****GO Enrichment**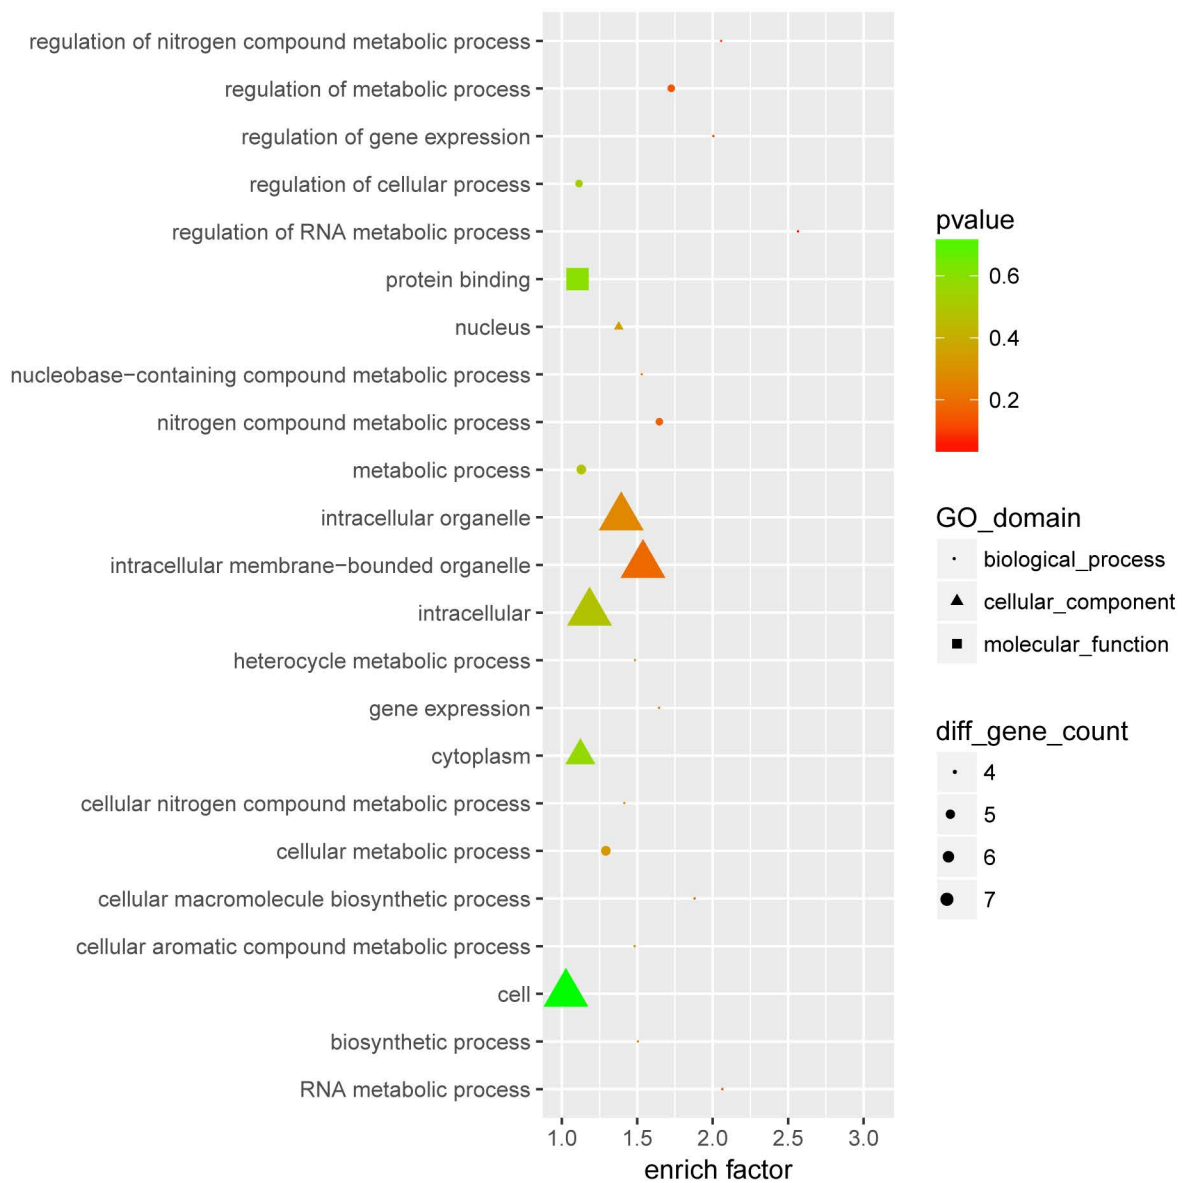

Supplement: inline-supplementary-material-5 [file inline-supplementary-material-5.pdf]
